# Supplementary material
Source: ML conference proceedings conference paper supplement (https://proceedings.neurips.cc/paper_files/paper/2020/hash/3b13b1eb44b05f57735764786fab9c2c-Abstract.html)
Supplement: Supplementary file [file 3b13b1eb44b05f57735764786fab9c2c-Supplemental.zip]

## 394 A Pseudo-code of PC Algorithm

395 For completeness, we provide the pseudo-code for the PC algorithm in Algorithm 3.

---

### Algorithm 3: PC Algorithm.

---

**Input:**  $V$ : vertex set,  $\mathcal{D}$ : dataset,  $T$ : threshold

```

1 Function  $PC(V, \mathcal{D}, T)$ :
2    $\mathcal{G}$  = complete graph on  $V$ ,  $ord = 0$ 
3   while  $\exists v_i$  s.t.  $|Adj(\mathcal{G}, v_i) - v_j| \geq ord$  do
4     while  $\exists \text{ edge } (v_i, v_j)$  s.t.  $|Adj(\mathcal{G}, v_i) - v_j| \geq ord$  that has not been tested do
5       select edge  $(v_i, v_j)$  in  $\mathcal{G}$  s.t.  $|Adj(\mathcal{G}, v_i) - v_j| \geq ord$ 
6       while  $\exists S$  that has not been tested do
7         choose  $S \subseteq Adj(\mathcal{G}, v_i) - v_j$ ,  $|S| = ord$ 
8         if  $indep\_test(ij|S) \geq T$  then
9           remove  $(v_i, v_j)$  from  $\mathcal{G}$ 
10          break
11        $ord = ord + 1$ 
12   Output  $\mathcal{G}$ 

```

---

## 396 B Exponential Mechanism & Sparse Vector Technique

397 For completeness, we provide detailed description of exponential mechanism and exponential mech-  
 398 anism.

399 **Exponential Mechanism.** Exponential mechanism is designed for differentially private selection  
 400 from infinite output set. It computes an utility score for each candidate output and randomly selects  
 401 from the output candidates based on probability derived from the utility score. The pseudo-code for  
 402 exponential mechanism is shown in Algorithm 4.

---

### Algorithm 4: Exponential Mechanism

---

**Input:**  $\mathcal{D}$ : dataset,  $O$ : output set,  $u$ : 1-sensitive utility function,  $\epsilon$ : privacy parameters.

```

1 Function  $EM(\mathcal{D}, O, u, \epsilon)$ :
2   Initiate  $U$  as an empty lists
3   for  $o \in O$  do
4     Append  $u(\mathcal{D}, o)$  to  $U$ 
5   Randomly select  $o$  from  $O$  according to probability  $\frac{\exp(\epsilon u_o/2)}{\sum_{u_i \in U} \exp(\epsilon u_i/2)}$ .

```

---

403 **Sparse Vector Technique.** Sparse vector technique is a widely used differentially private mecha-  
 404 nism. It can answer a large number of queries while only paying privacy cost for a small portion of  
 405 them. The pseudo-code for sparse vector technique is shown in Algorithm 5.

## 406 C Proof for Error Bound

**Theorem 4** (Type I error bound). *Let  $E_1^\alpha$  denotes the event that Algorithm 1 filters out  $f(D) \geq T + \alpha$ .*

$$\mathbb{P}[E_1^\alpha] \leq \exp\left(-\frac{\epsilon'(\alpha + t)}{6\Delta}\right) - \frac{1}{4} \exp\left(-\frac{\epsilon'(\alpha + t)}{3\Delta}\right)$$

407 .

*Proof.* We want to upper bound the probability of  $E_1^\alpha$ . Equally, we lower bound the probability of  $\neg E_1^\alpha$  by the probability that the noise on the threshold is smaller than  $\frac{1}{3}(t + \alpha)$  and the noise on the

---

**Algorithm 5:** Sparse Vector Technique.

---

**Input:**  $D$ : dataset,  $\{f_i\}$ : 1-sensitive queries,  $T$ : threshold,  
 $c$ : quota of above-threshold queries,  $(\epsilon, \delta)$ : privacy parameters.

```

1 Function  $SVT(\mathcal{D}, \{f_i\}, T, c, \epsilon, \delta)$ :
2   if  $\delta = 0$  then Let  $\sigma = \frac{2c}{\epsilon}$  else Let  $\sigma = \frac{\sqrt{32c \log \frac{1}{\delta}}}{\epsilon}$ 
3   Let  $\text{count} = 0, \hat{T}_{\text{count}} = T + \text{Lap}(\sigma)$ 
4   for Each query  $i$  do
5     Let  $\nu = \text{Lap}(2\sigma)$ 
6     if  $f_i(\mathcal{D}) + \nu_i \geq \hat{T}_{\text{count}}$  then
7       Output  $a_i = \top$ 
8       Let  $\text{count} = \text{count} + 1$  Let  $\hat{T}_{\text{count}} = T + \text{Lap}(\sigma)$ 
9     else Output  $a_i = \perp$ 
10    if  $\text{count} \geq c$  then Halt

```

---

query output is smaller than  $\frac{2}{3}(t + \alpha)$ . Because for Laplace noise,  $\mathbb{P}[x \geq w] = \exp(-w/b)$ , we have

$$\mathbb{P}[\neg E_1^\alpha] \geq (1 - \frac{1}{2} \exp(-\frac{\epsilon'(\alpha + t)}{6\Delta}))^2 = 1 - \exp(-\frac{\epsilon'(\alpha + t)}{6\Delta}) + \frac{1}{4} \exp(-\frac{\epsilon'(\alpha + t)}{3\Delta})$$

. Thus,

$$\mathbb{P}[E_1^\alpha] \leq 1 - \mathbb{P}[\neg E_1^\alpha] \leq \exp(-\frac{\epsilon'(\alpha + t)}{6\Delta}) - \frac{1}{4} \exp(-\frac{\epsilon'(\alpha + t)}{3\Delta})$$

408

□

**Theorem 5** (Type II error bound). *Let  $E_2^\alpha$  denotes the event that Algorithm 1 fails to filter out  $f(D) \leq T - \alpha$ . If  $\alpha \geq t$ , then*

$$\mathbb{P}[E_2^\alpha] \leq \exp(-\frac{12\epsilon\alpha + \epsilon'(\alpha - t)}{6\Delta}) - \frac{1}{4} \exp(-\frac{6\epsilon\alpha + \epsilon'(\alpha - t)}{3\Delta})$$

409

*Proof.* If  $f(D)$  is not filtered out, it needs to be missed by both sparse vector technique and the Laplace mechanism. The probability bound for being missed by the sparse vector technique is

$$\mathbb{P}[E_{svt}^\alpha] \leq \exp(-\frac{\epsilon'(\alpha - t)}{6\Delta}) - \frac{1}{4} \exp(-\frac{\epsilon'(\alpha - t)}{3\Delta})$$

following similar proof path to theorem 4. The probability being missed by the Laplace mechanism is bounded by

$$\mathbb{P}[E_{lm}^\alpha] = \exp(-\frac{2\epsilon\alpha}{\Delta})$$

410 . Thus,

$$\begin{aligned} \mathbb{P}[E_2^\alpha] &= \mathbb{P}[E_{svt}^\alpha] \cdot \mathbb{P}[E_{lm}^\alpha] \leq (\exp(-\frac{\epsilon'(\alpha - t)}{6\Delta}) - \frac{1}{4} \exp(-\frac{\epsilon'(\alpha - t)}{3\Delta})) \cdot \exp(-\frac{2\epsilon\alpha}{\Delta}) \\ &= \exp(-\frac{12\epsilon\alpha + \epsilon'(\alpha - t)}{6\Delta}) - \frac{1}{4} \exp(-\frac{6\epsilon\alpha + \epsilon'(\alpha - t)}{3\Delta}) \end{aligned}$$

411

□

## 412 D Sensitivity of Kendall's $\tau$

413 In this section, we derive the sensitivity of Kendall's  $\tau$  and its conditional version. We first give the  
 414 complete definition of Kendall's  $\tau$  and its conditional version.

**Definition 5** (Kendall's  $\tau$ ). Let  $\{(a_1, b_1), \dots, (a_n, b_n)\}$  denotes the observations. A pair of observation indices  $(i, j)$  are called concordant if  $a_i > a_j$  and  $b_i > b_j$ . Otherwise  $(i, j)$  is called discordant. Kendall's  $\tau$  is defined as

$$\tau_{ij} := \frac{2|C - D|}{n(n-1)}$$

where  $C$  is the number of concordant pairs and  $D$  is the number of discordant pairs.

Kusner et al. [15] derive the sensitivity for unconditional Kendall's  $\tau$  when the neighboring relation between datasets are constrained to replacement. The first step towards complete sensitivity analysis for unconditional Kendall's  $\tau$  is to extend the neighboring relation to increment.

**Theorem 6.** Kendall's  $\tau$  is  $\frac{2}{n-1}$ -sensitive.

*Proof.* When the neighboring datasets are defined by replacement, the proof is done in [15]. Now we prove that the sensitivity bound generalizes to neighboring datasets defined by increment.

If we increment a dataset by one row,  $|C - D|$  can increase by at most  $n$ .

$$s(\tau_{ij}) \leq \frac{|C - D| + n}{\frac{1}{2}n(n+1)} - \frac{|C - D|}{\frac{1}{2}n(n-1)} \leq \frac{|C - D| + n}{\frac{1}{2}n(n-1)} - \frac{|C - D|}{\frac{1}{2}n(n-1)} \leq \frac{2}{n-1}$$

□

**Theorem 7.** If the conditional variables have  $k$  blocks, then conditional Kendall's  $\tau$  is  $\frac{c_\tau}{\sqrt{n-1}}$ -sensitive, where  $c_\tau$  is an explicit constant typically close to  $\frac{9}{2}$ .

**Definition 6** (Conditional Kendall's  $\tau$ ). We omit the pair indices  $i, j$  and use  $\tau_i$  to represent Kendall's  $\tau$  in the  $i$ th block of the conditional variables. If there are  $k$  blocks in total, then conditional Kendall's  $\tau$  is defined as

$$\tau = \frac{\sum_{i=1}^k w_i \tau_i}{\sqrt{\sum_{j=1}^k w_j}}$$

where  $w_i = \frac{9n_i(n_i-1)}{2(2n_i+5)}$  is the inverse of  $\tau_i$ 's variance.

*Proof.* If the  $i$ th block contains  $n_i$  observations, then  $s(\tau_i) = \frac{2}{n_i-1}$ .

Then we need to bound  $\frac{w_i}{\sqrt{\sum_{j=1}^k w_j}}$  and its sensitivity. Assuming  $\forall i \in [1, k], n_i \geq c_1$ , then  $c_2(n_i - 1) \leq w_i \leq \frac{9(n_i-1)}{4}$  for some explicit constants  $c_2 = \frac{9c_1}{2(2c_1+5)}$ . Thus

$$\frac{w_i}{\sqrt{\sum_{j=1}^k w_j}} \leq \frac{9(n_i-1)}{4\sqrt{c_2(n-k)}}$$

and

$$s\left(\frac{w_i}{\sqrt{\sum_{j=1}^k w_j}}\right) \leq \frac{w'_i}{\sqrt{\sum_{j \neq i} w_j + w'_i}} - \frac{w_i}{\sqrt{\sum_{j=1}^k w_j}} \leq \frac{w'_i - w_i}{\sqrt{\sum_{j=1}^k w_j}} \leq \frac{9}{4\sqrt{c_2(n-k)}}$$

. Thus the complete sensitivity is bounded as follow.

$$s(\tau) \leq \left(\frac{w_i}{\sqrt{\sum_{j=1}^k w_j}} + s\left(\frac{w_i}{\sqrt{\sum_{j=1}^k w_j}}\right)\right)(\tau_i + s(\tau_i)) - \frac{w_i}{\sqrt{\sum_{j=1}^k w_j}} \tau_i \leq \frac{27}{4\sqrt{c_2(n-k)}} + \frac{9}{2c_1\sqrt{c_2(n-k)}}$$

□

## E Sensitivity of Spearman's $\rho$

In this section, we derive the sensitivity of Spearman's  $\rho$  and its conditional version. We first give the complete definition of Spearman's  $\rho$  and its conditional version.

**Definition 7** (Spearman's  $\rho$ ). *Let  $\{(a_1, b_1), \dots, (a_n, b_n)\}$  denotes the observations. If we independently sort the observations  $\{a_1, \dots, a_n\}$  and  $\{b_1, \dots, b_n\}$  in ascending order. Let  $d_i$  represent the distance between the order of  $a_i$  and  $b_i$ . Spearman's  $\rho$  is defined as*

$$\rho = |1 - \frac{6 \sum_{i=1}^n d_i^2}{n(n-1)}|$$

Kusner et al. [15] derive the sensitivity for unconditional Spearman's  $\rho$  when the neighboring relation between datasets are constrained to replacement. The first step towards complete sensitivity analysis for unconditional Spearman's  $\rho$  is to extend the neighboring relation to increment.

**Theorem 8.** *Spearman's  $\rho$  is  $\frac{30}{n}$ -sensitive.*

*Proof.* When the neighboring datasets are defined by replacement, the proof is done in [15]. Now we prove that the sensitivity bound generalizes to neighboring datasets defined by increment. And we denote the incremented observation with  $(a_{n+1}, b_{n+1})$ . First,  $\forall i \neq n+1$ ,  $d_i$  changes at most 2. Thus  $d_i^2 - (d_i - 2)^2 \leq 4(d_i - 1) \leq 4(m - 2)$ , because  $d_i$  is smaller than  $m - 1$ . Besides,  $d_{n+1}$  is at most  $m$ . Therefore, the sensitivity of  $\rho$  is bounded by

$$s(\rho) \leq \frac{30m(m-1)}{m(m^2-1)} \leq \frac{30}{m}$$

**Definition 8** (Conditional Spearman's  $\rho$ ). *We omit the pair indices  $i, j$  and use  $\rho_i$  to represent Spearman's  $\rho$  in the  $i$ th block of the conditional variables. If there are  $k$  blocks in total, then conditional Spearman's  $\rho$  is defined as*

$$\rho = \frac{\sum_{i=1}^k w_i \rho_i}{\sqrt{\sum_{j=1}^k w_j}}$$

where  $w_i = n_i - 1$ .

**Theorem 9.** *Conditional Spearman's  $\rho$  is  $\frac{c_\rho \sqrt{k}}{\sqrt{n-k}}$ -sensitive, where  $c_\rho$  is an explicit constant typically close to 31.*

*Proof.* If the  $i$ th block contains  $n_i$  observations, then  $s(\rho_i) = \frac{30}{n_i}$ .

Then we need to bound  $\frac{w_i}{\sqrt{\sum_{j=1}^k w_j}}$  and its sensitivity.

$$\frac{w_i}{\sqrt{\sum_{j=1}^k w_j^2}} \leq \frac{n_i - 1}{\sqrt{n - k}}$$

and

$$s\left(\frac{w_i}{\sqrt{\sum_{j=1}^k w_j}}\right) \leq \frac{w'_i}{\sqrt{\sum_{j \neq i} w_j + w'_i}} - \frac{w_i}{\sqrt{\sum_{j=1}^k w_j}} \leq \frac{w'_i - w_i}{\sqrt{\sum_{j=1}^k w_j}} \leq \frac{1}{\sqrt{n - k}}$$

. Thus the complete sensitivity is bounded as follow.

$$s(\rho) \leq \left(\frac{w_i}{\sqrt{\sum_{j=1}^k w_j}} + s\left(\frac{w_i}{\sqrt{\sum_{j=1}^k w_j}}\right)\right)(\rho_i + s(\rho_i)) - \frac{w_i}{\sqrt{\sum_{j=1}^k w_j}} \rho_i \leq \frac{31}{\sqrt{n - k}} + \frac{30}{c_1 \sqrt{n - k}}$$

## 443 F Reconcile Sensitive Independence Test

444 As an attempt to reconcile independence tests with infinite sensitivity such as G-test or  $\chi^2$ -test in  
 445 Priv-PC, we use subsample-and-aggregate and median aggregation with local sensitivity to stabilize  
 446 these independence tests.

447 **Definition 9** (Subsample-and-aggregate [7]). *Let  $f$  be the function of interest. In subsample-and-*  
 448 *aggregate, the input database is randomly partitioned into  $m$  blocks and  $f$  is computed exactly on*  
 449 *each block. The outcomes are then aggregated using a differentially private aggregation mechanism*  
 450 *such as trimmed mean.*

451 In order to use subsample-and-aggregate, we clip the outcome of the independence test to a bounded  
 452 range and estimate the median by adding noise calibrated to the smooth sensitivity [21].

**Definition 10** (Median Aggregation with Local Sensitivity [21]). *Let  $S_{med}(x)$  represent the smooth*  
*sensitivity of the median of a given input  $x$ .  $S_{med}(x)$  can be  $\beta$  upper bounded by the following*  
*formula in  $\mathcal{O}(n \log(n))$ .*

$$S_{med}(x) = \max_{k=0, \dots, n} (e^{-k\epsilon} \cdot \max_{t=0, \dots, k+1} (x_{m+t} - x_{m+t-k-1}))$$

453 where  $m$  is the median index. Let  $Z$  be a random value taken from an  $(\alpha, \beta)$ -admissible noise  
 454 probability density function, then  $med(x) + \frac{S_{med}(x)}{\alpha} \cdot Z$  is  $(\epsilon, \delta)$ -differentially private where  $\epsilon$  and  
 455  $\delta$  depends on  $\alpha$  and  $\beta$ . For instance, the Laplace distribution  $p(z) = \frac{1}{2} \cdot e^{-|z|}$  is  $(\epsilon/2, \epsilon \ln(1/\delta)/2)$ -  
 456 admissible; the Gaussian distribution  $p(z) = \frac{1}{2\pi} \cdot e^{-z^2/2}$  is  $(\epsilon/\sqrt{\ln(1/\delta)}, \epsilon/2 \ln(1/\delta))$ -admissible.

---

### Algorithm 6: Reconciled Independence Tests.

---

**Input:**  $D$ : dataset,  $m$ : number of blocks,  $f$ : independence test function,  $T$ : threshold,  $\epsilon, \delta$ :  
 privacy parameters,  $Z$ :  $(\alpha, \beta)$ -admissible distribution.

```

1 Function ReconciledIDT( $D, f, T, \epsilon, \delta, Z$ ):
2   Partition the dataset in  $m$  blocks  $D_1, \dots, D_m$ .
3   Compute  $f(D_1), \dots, f(D_m)$ .
4   Let  $z \leftarrow Z$ .
5   Output  $med(f(D_1), \dots, f(D_m)) + \frac{S_{med}(f(D_1), \dots, f(D_m))}{\alpha} \cdot z$ 

```

---
